# Supplementary material
Source: PubMed Central journal article supplement (PMC8022798)

**Supplementary Figure 1. Summary of quantification for experiments and western blots to validate protein levels.** (A) Western blot and *in situ* phenotype scoring associated with Figure 2A. (B) Western blot and *in situ* phenotype scoring associated with Figure 2C,D. (C) Western blot and *in situ* phenotype scoring associated with Figure 3B,C. (D) Western blot and *in situ* phenotype scoring associated with Figure 4B,C. (E) Western blot and *in situ* phenotype scoring associated with Figure 5B,C. (F) Western blot associated with Figure 6. (G) Western blot associated with Figure 7.

**Supplementary Figure 2. Validation of Sox10 morpholino and whole embryo rescue experiments.** (A) *In situ* hybridization examining *Sox10* expression in Sox10 morpholino injected embryos. (B) Validation of Sox10 morpholino by western blot. (C) *In situ* hybridization examining *Snail2* expression in neurula (stage 15) embryos injected unilaterally with Sox10 morpholino and Sox2, Sox3, Sox9, or Sox10 mRNA. (D) *In situ* hybridization examining *FoxD3* expression in neurula (stage 15) embryos injected unilaterally with Sox10 morpholino and Sox2, Sox3, Sox9, or Sox10 mRNA. (E) Western blot for Sox factor protein levels from experiments in (C, D).

Supplementary Figure 1

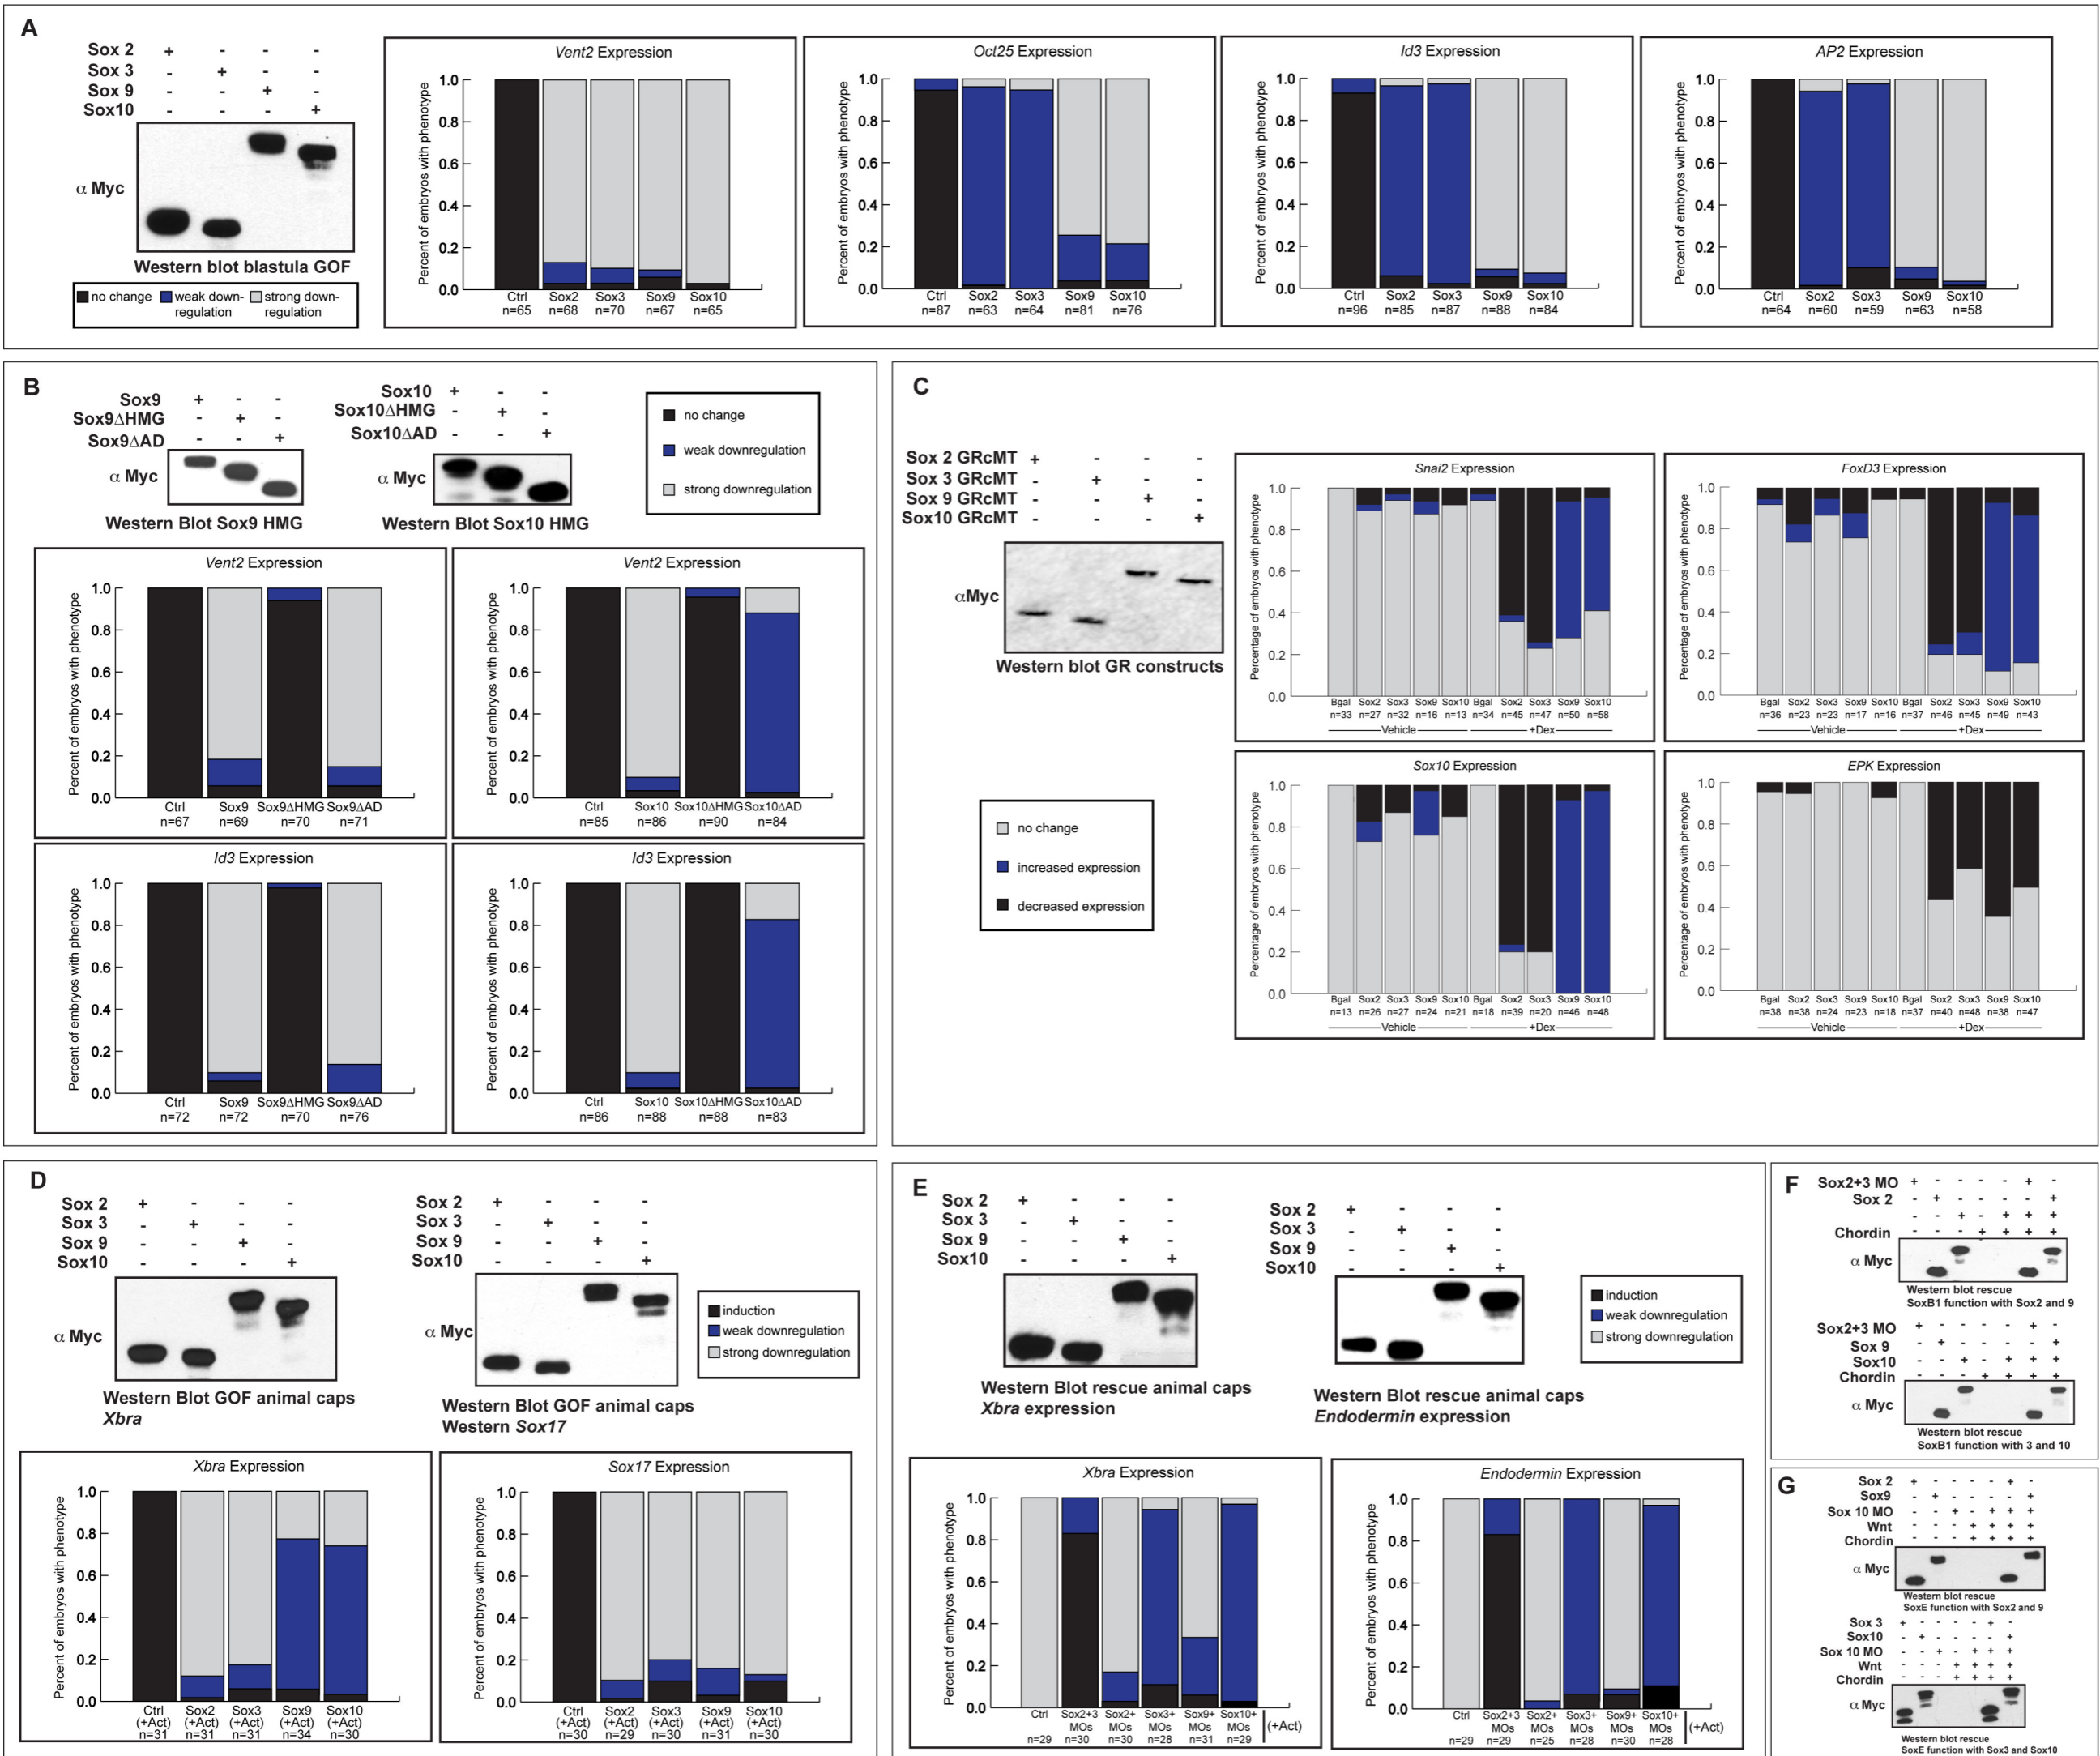

## Supplementary Figure 2

**A**

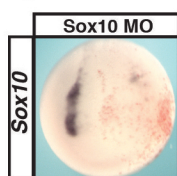

**B**

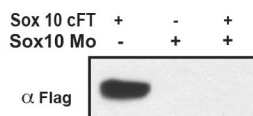

**C**

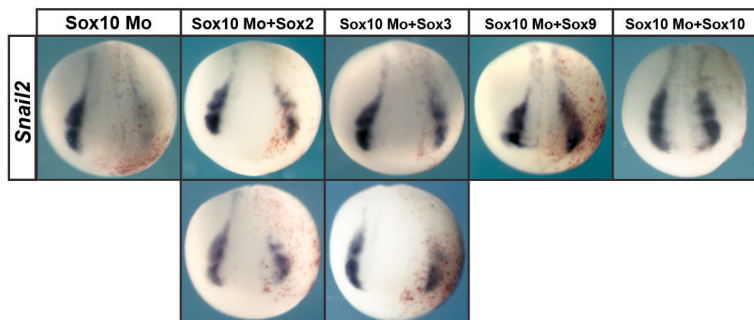

**D**

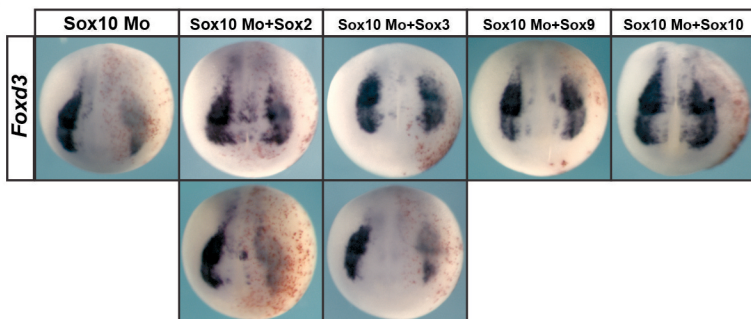

**E**

|           |   |   |   |   |   |
|-----------|---|---|---|---|---|
| Sox10 Mo  | + | + | + | + | + |
| Sox2 mRNA | + | - | - | - | - |
| Sox3 mRNA | - | + | - | - | - |
| Sox9 mRNA | - | - | + | - | - |
| Sox10mRNA | - | - | - | + | + |

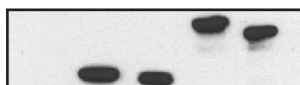

Supplement: NIHMS1669508-supplement-1.pdf [file NIHMS1669508-supplement-1.pdf]
